# Supplementary material
Source: Research Square preprint supplement (doi:10.21203/rs.3.rs-8959783/v1)
Supplement: Supplementary file 1 [file 72c5fe0d746cc43908f7705f.docx]

Supplementary Materials for

**Quantitative Measurement of Atomic Coordination at the Single-Atom Limit**

Aowen Li1, Linxuan Li1, Xuetao Qin2, Zhihu Sun3, Stephen J. Pennycook1, Ding Ma2*, Wu Zhou1*

1School of Physical Sciences, University of Chinese Academy of Sciences, Beijing 100049, China

2Beijing National Laboratory for Molecular Science, New Cornerstone Science Laboratory, College of Chemistry and Molecular Engineering, Peking University, Beijing 100871, China.

3National Synchrotron Radiation Laboratory, University of Science and Technology of China, Hefei 230029, China

***** Corresponding authors: (W.Z.) [wuzhou@ucas.ac.cn](mailto:wuzhou@ucas.ac.cn); (D.M.) [dma@pku.edu.cn](mailto:dma@pku.edu.cn)

**The PDF file includes:**

Materials and Methods

Figs. S1 to S5

Tables S1 to S3

References

**Materials and Methods**

S1. Sample preparation

The epitaxial graphene/6H-phase silicon carbide (6H-SiC) interface sample was fabricated using a Thermo Scientific Helios G4 CX DualBeam system. The working voltage and current for the ion beam for preparing the lamellas was reduced gradually during the sample thinning to minimize the sample damage. The surface amorphization on the lamella was reduced by final polishing with an ion beam of 2 kV and 23 pA. The graphene sample was produced by transferring a piece of chemical vapor deposition (CVD) grown graphene on a Quantifoil TEM grid. The Silicon impurities in graphene were introduced from the quartz tube during graphene growth. To avoid contamination in the scanning transmission electron microscopy (STEM) observation, all the samples were baked at 160℃ for about 20 hours before loading into the microscope.

S2. STEM experiment

A Nion HERMES-100 microscope, equipped with a 5th-order aberration corrector and an advanced direct electron detector (DECTRIS ELA) was operated at a 60 kV accelerating voltage for the atomic scale extended energy-loss fine structure (EXELFS) measurements. The convergence semi-angle and collection semi-angle applied for EXELFS measurements were 32 mrad and 75 mrad, respectively. The energy dispersion of EELS was set to 0.9 eV per channel. The collection semi-angle of annular dark-field (ADF) imaging was 75 to 210 mrad.

For the electron energy-loss spectroscopy (EELS) data collected on the bulk crystalline Si and graphene/6H-SiC interface, both the low-loss and core-loss spectrum images (SIs) were acquired at each characterization region. The EELS signals were focused on both low-loss and core-loss energy ranges. A low beam current of 10 pA and a short dwell time of 5 ms were applied to acquire the pristine structure of the graphene/6H-SiC interface. The scanning region for each SI is nm2 (pixels). The Si-*K* spectrum of each SiC bilayer was summed by 232 sets of SI, making its quality enough for quantitative EXELFS analysis. The total electron dose on each SiC bilayer is about e-. The C-*K* energy-loss near edge fine structure (ELNES) shown in Fig. S3 spectra were obtained with an energy dispersion of 0.1 eV per channel.

For Si point defects in graphene, a 0.6 nm2 window was employed for SI acquisition. The applied probe current for EELS is 70 pA. The dimension chosen for the Si-C4 point defects is 128 pixel2 with a dwell time of 5 ms for each pixel, while it for the Si-C3 point defects is 128 pixel2 with a dwell time of 3 ms for each pixel or 64 pixel2 with a dwell time of 5 ms for each pixel. The positions of the Si atoms were first determined in the simultaneously collected ADF image, and then a round mask was employed to extract the signals on the Si atoms from the corresponding spectrum images. The quantitative EXELFS analysis is based on the sum of 96 datasets of Si-C4 and 304 datasets of Si-C3.

S3. EELS data processing

For all the Si-*K* spectra, the energy-loss values were calibrated by taking the onset of Si bulk at 1839 eV as a reference. The pre-edge background of the core-loss spectra was subtracted by power-law function. The effect of plural scattering in the core-loss spectra of the bulk sample was removed by Fourier-ratio deconvolution function in Digital Micrograph (Gatan Inc.). The summed spectra of the Si-C4 and Si-C3 point defects were denoised by local low rank method 1, as shown in Figs. S5c-d. The EXELFS fitting analysis of Si bulk, graphene/6H-SiC interface and Si point defects in graphene was performed by *Athena* and *Artemis* software 2. It is important to note that, despite the finite momentum transfers (*q*) of the scattered electrons, the contribution of signals beyond the dipole limit in EELS measurement is expected to be minimal. This is because the inelastic scattering cross-section decreases proportional to *q-4* 3.


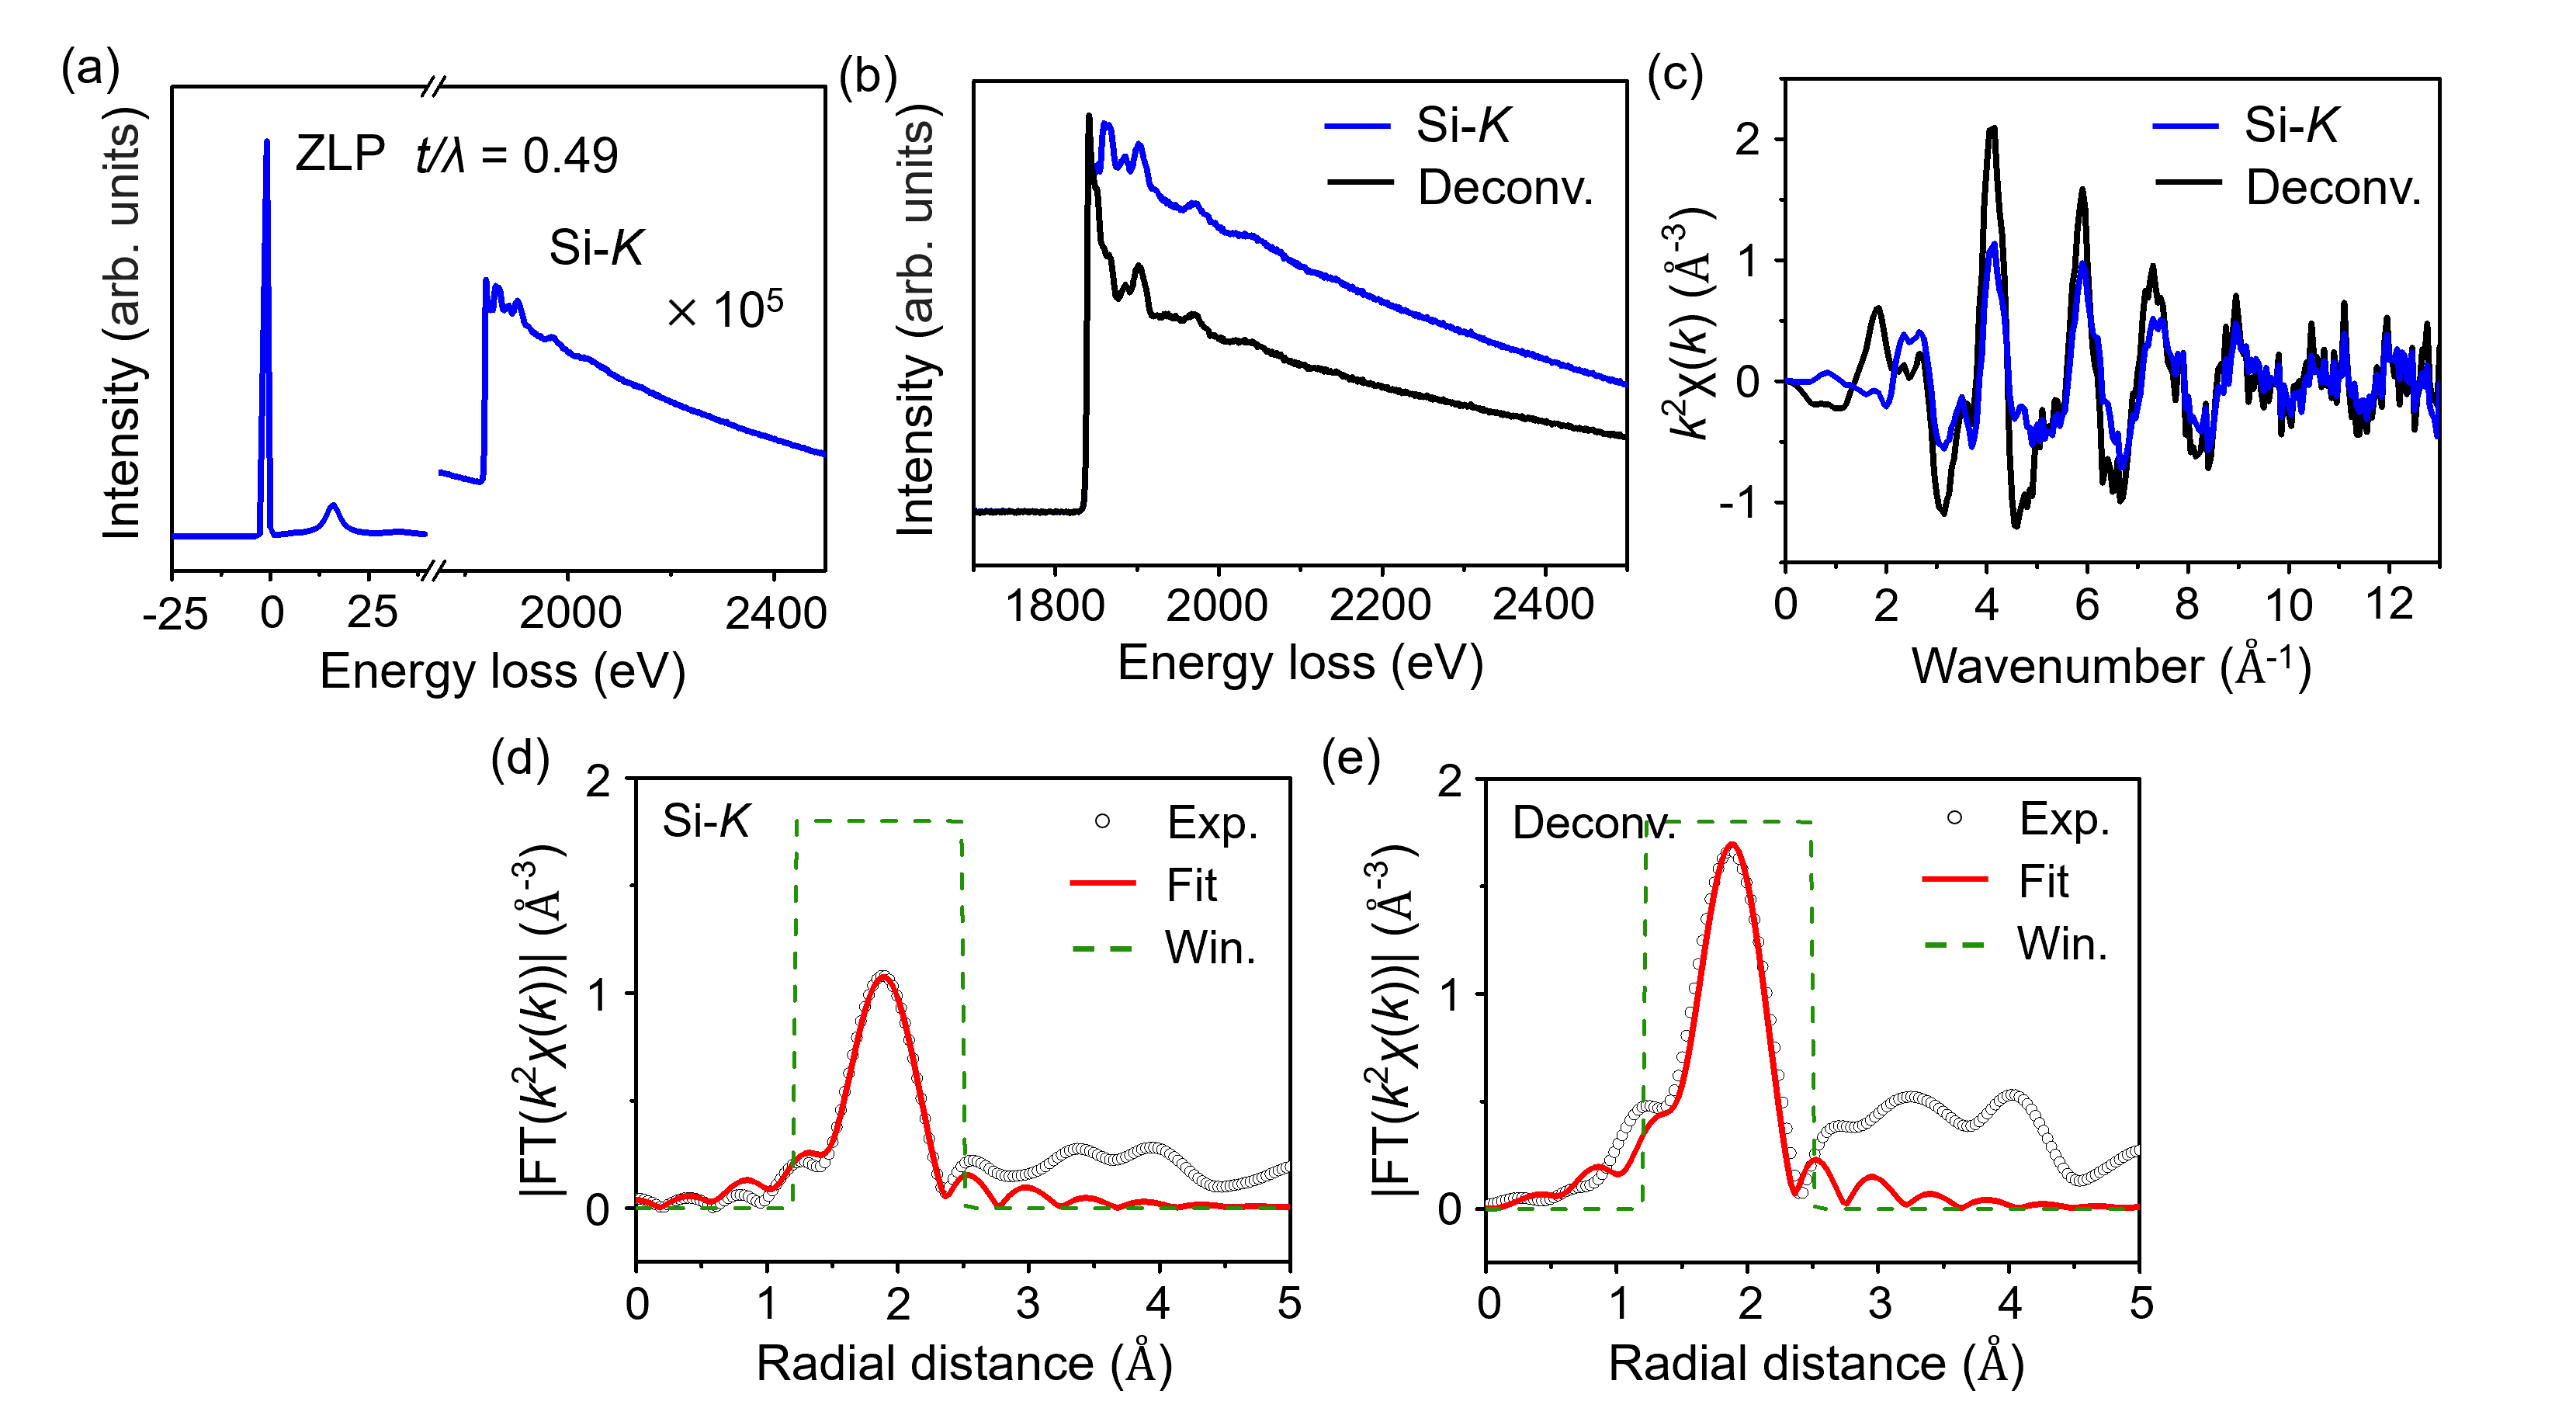


**Fig. S1. Comparison of the oscillatory features between the raw Si-*K* spectrum and its deconvolution.** (a) Low-loss and core-loss EEL spectra of the Si bulk sample. The zero-loss peak (ZLP) includes the elastically scattered electrons. The thickness of the Si bulk sample (*t*) relative to the inelastic mean free path (*λ*) is 0.49. (b) Raw Si-*K* spectrum and its deconvolution (Deconv.). (c) spectra converted from (b). Fitting result of the (d) raw Si-*K* edge and (e) deconvoluted Si-*K* edge.

The amplitude of the oscillatory features is substantially reduced in the raw Si-*K* spectrum.

**Table S1. Curve-fit parameters*a* for Si-*K* edge of bulk Si.** The *R* space fitting result is illustrated in Figs. S1(d-e).

| Sample | path | R*b* (Å) | C.N.*c* (set) | | S02 | σ2 (Å2)*d* | ΔE0 (eV) | R-factor (*10-3) |
| --- | --- | --- | --- | --- | --- | --- | --- | --- |
| Si 4 | Si-Si | 2.35 |  |  | |  |  |  |
| Raw  Si-*K* edge | Si-Si | 2.28±0.01 | 4 | 0.41±0.05 | | 0.002  ±0.002 | 7.0±1.1 | 7.4 |
| Deconv. Si-*K* edge | Si-Si | 2.30±0.02 | 4 | 0.77±0.16 | | 0.004  ±0.003 | 4.3±1.9 | 21.3 |

*a*: The selected *R* window and *k* window for the EXELFS fitting are 1.2-2.5 Å and 2.0-9.7 Å-1, respectively. *b*: The half path length. The path for Si-Si is from the crystal structure of Si model (Fd-3m) 4. *c*: The coordination number (C.N.) was set to be 4 as considering a bulk Si crystal structure. *d*: Debye-Waller factor.

The S02 value is dependent on the ionization edge and experimental setup, which is generally in the range of 0.75 to 1.0. Comparing the fitting results of the raw and deconvoluted (deconv.) Si-*K* spectra, the S02 value in the former is much smaller than the latter. This is because plural scattering substantially reduces the oscillatory features, indicating the importance of the deconvolution process in bulk sample analysis. The value of S02 in the deconvoluted spectra was adopted in the following studies of graphene/6H-SiC interface and Si point defects in graphene.


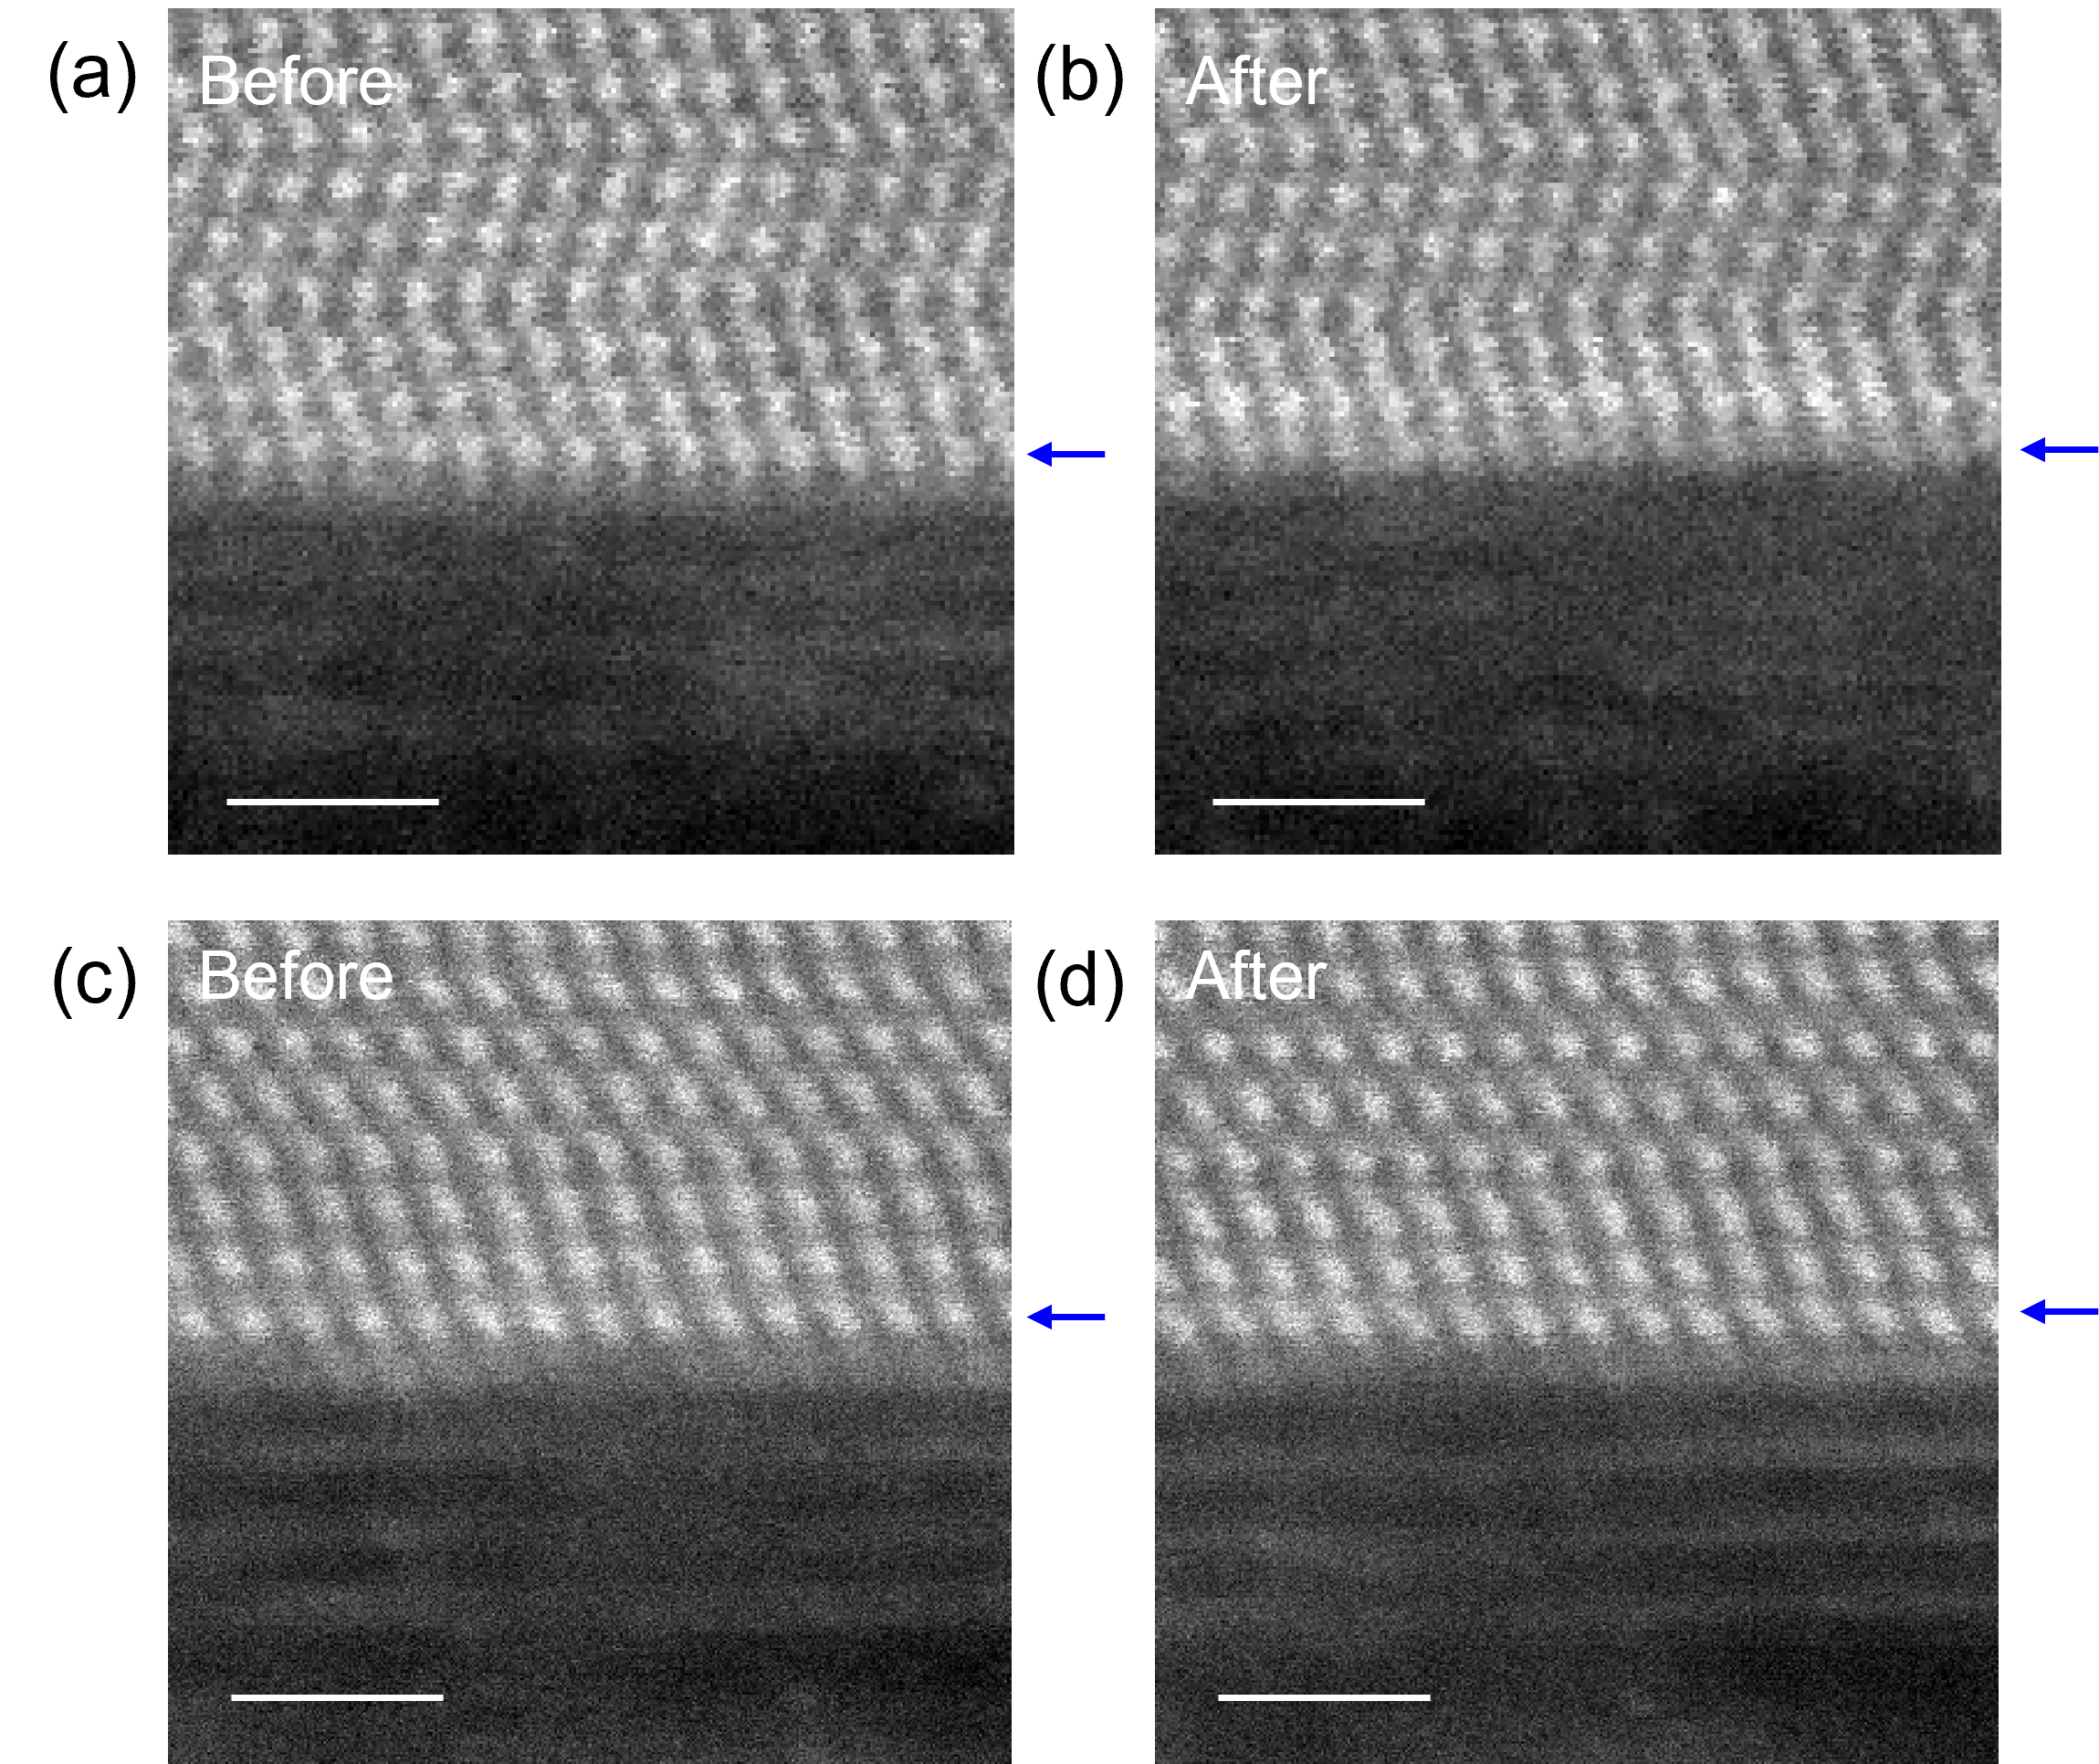


**Fig. S2 Comparison of beam damage on the graphene/6H-SiC interface with different acquisition parameters.** (a-b) STEM-ADF image acquired before and after the SI acquisition with a beam current of 24 pA and a dwell time of 15 ms. (c-d) STEM-ADF image acquired before and after the SI acquisition with a beam current of 10 pA and a dwell time of 5 ms. The blue arrows denote the position of the 1st SiC bilayer. Scale bar: 1 nm.

As Figs. S2a-b show, the Si atoms in the 1st SiC bilayer become dim after SI acquisition, indicating structural damage in the interface region. The beam damage is avoided when decreasing the beam current and dwell time (Figs. S2c-d).


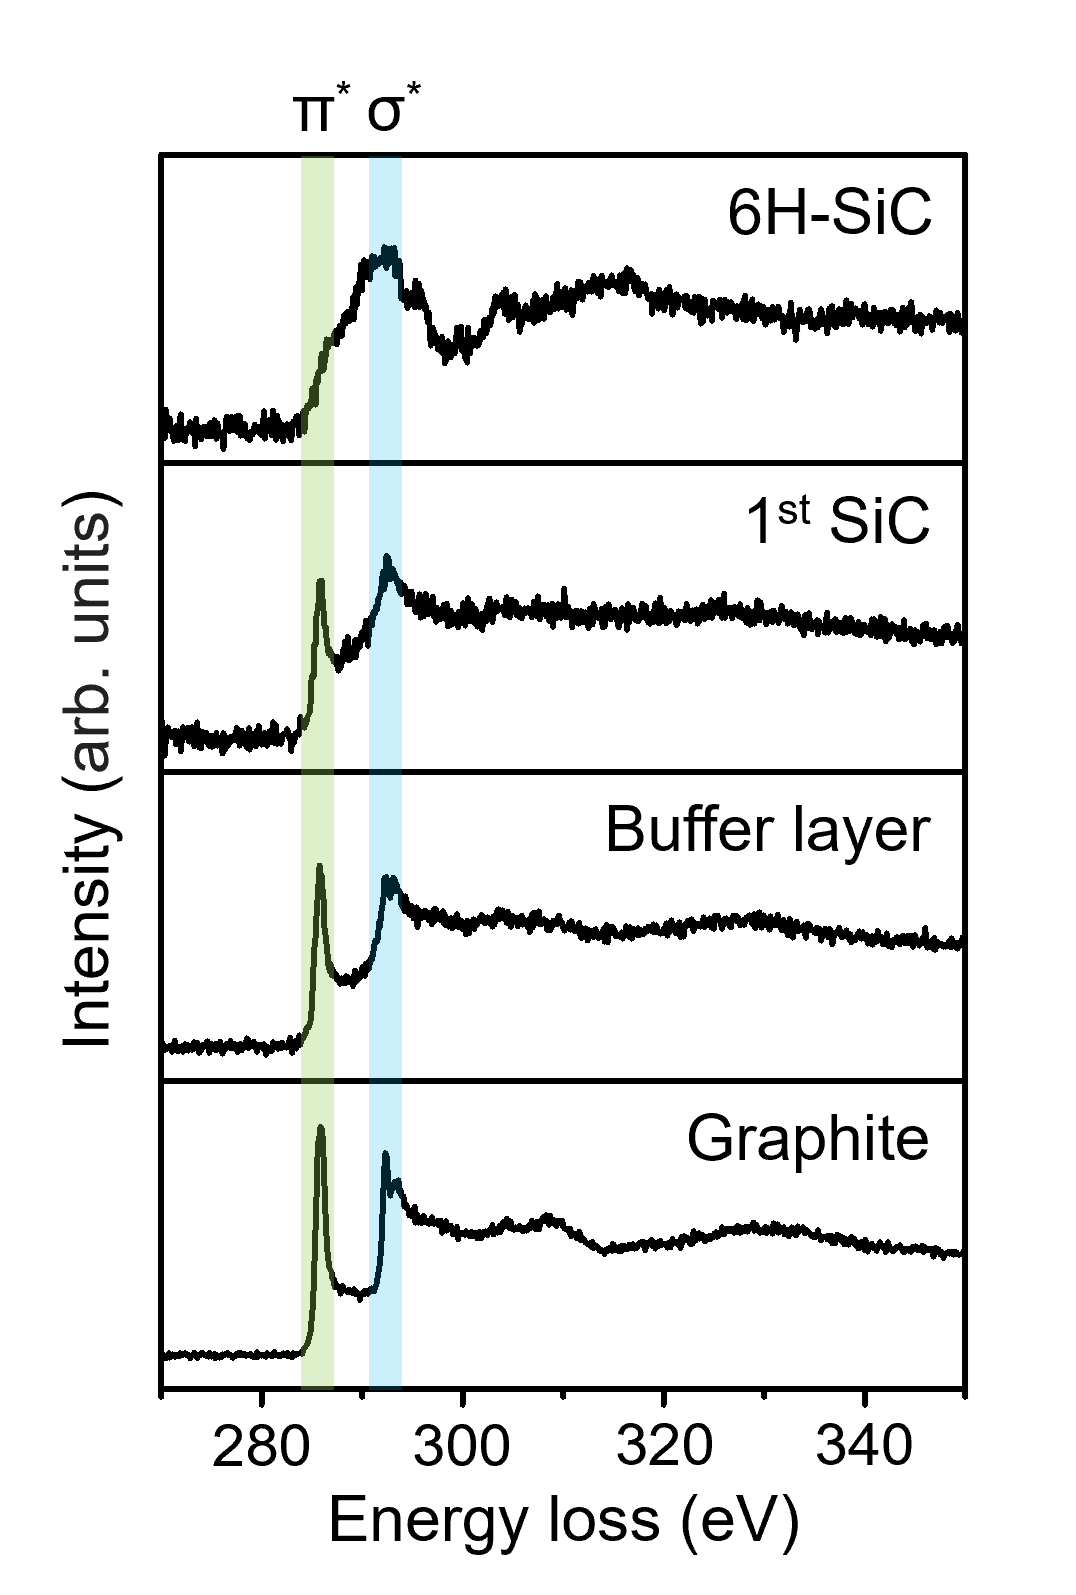


**Fig. S3. C-*K* ELNES spectra extracted from the bulk region of 6H-SiC and graphite, as well as the 1st SiC bilayer and the buffer layer.**


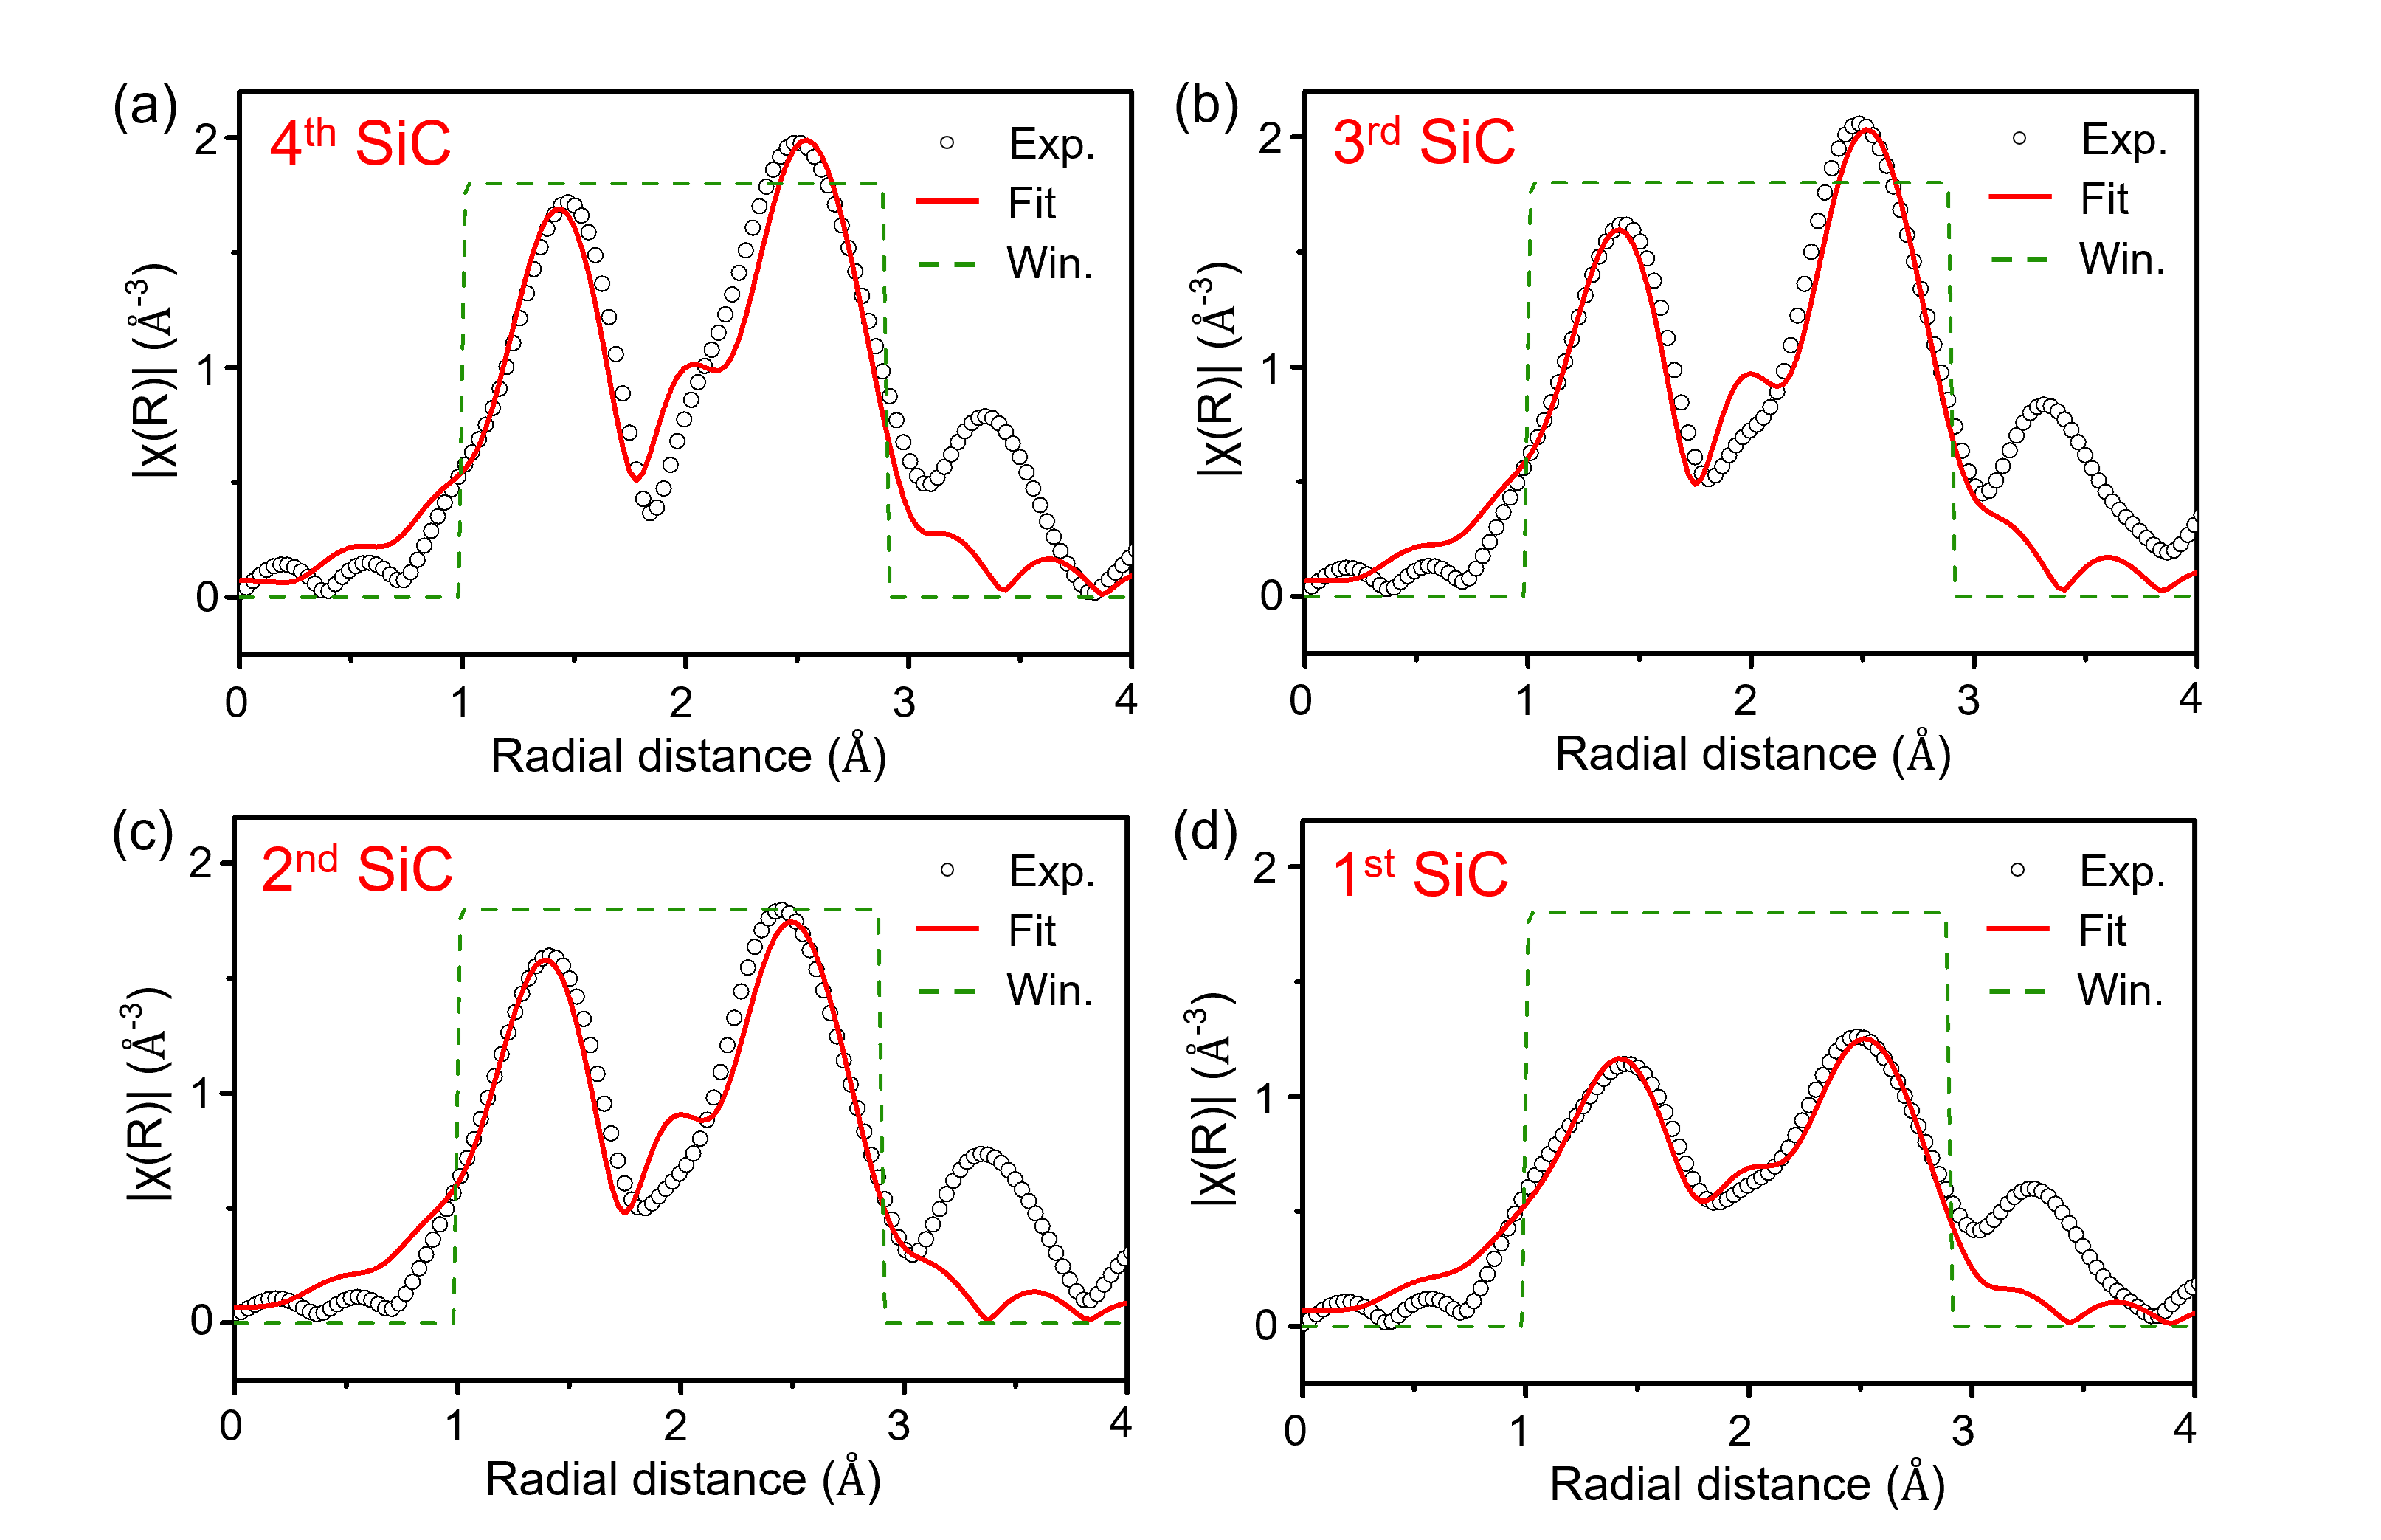


**Fig. S4. Fitting results of the Si-*K* edge EXELFS of the four outermost SiC bilayers at the graphite-SiC interface.** The results from the (a) 4th, (b) 3rd, (c) 2nd and (d) 1st SiC bilayers, respectively.

**Table S2. Curve-fit parameters*a* for Si-*K* edge of the SiC bilayers.** The *R* space fitting results are illustrated in Fig. S4.

| Sample | paths | R*b* (Å) | C.N.*c* | σ2 (Å2)*d* | ΔE0 (eV) | R-factor (*10-3) |
| --- | --- | --- | --- | --- | --- | --- |
| 6H-SiC 5 | Si-C | 1.89 | 4 |  |  |  |
| Si-Si | 3.08 | 12 |  |  |  |
| 4th SiC | Si-C | 1.83±0.03 | 3.8±1.4 | 0.002±0.007 | 4.6±2.1 | 35.0 |
| Si-Si | 3.04±0.03 | 11.5±3.9 | 0.005±0.005 |
| 3rd SiC | Si-C | 1.81±0.03 | 4.0±1.3 | 0.003±0.006 | 3.5±1.7 | 24.2 |
| Si-Si | 3.03±0.03 | 10.2±2.9 | 0.004±0.004 |
| 2nd SiC | Si-C | 1.80±0.03 | 4.0±1.4 | 0.003±0.006 | 3.1±2.0 | 30.2 |
| Si-Si | 3.03±0.03 | 9.5±3.2 | 0.005±0.005 |
| 1st SiC | Si-C | 1.84±0.03 | 4.2±1.0 | 0.010±0.006 | 4.5±1.6 | 14.8 |
| Si-Si | 3.05±0.02 | 7.8±1.9 | 0.006±0.004 |

*a*: The selected *R* window and *k* window for the EXELFS fitting are 1.0-2.9 Å and 2.0-9.7 Å-1, respectively. The *S02* was set to be 7.7. *b*: The half path length. The paths for Si-C and Si-Si is from the crystal structure of 6H-SiC model (P6₃mc) 5. *c*: Coordination number. *d*: Debye-Waller factor.

The Debye-Waller factor (σ2) reflects contributions from both thermally induced dynamic disorder and geometrically induced static disorder. In bulk 6H-SiC, the Si atoms are bonded to 4 C atoms and the corresponding distance between the atoms (*DSi-C*) are identical with each other. Therefore, the σ2 for the Si-C coordination shell of the inner Si atoms are dominated by the dynamic disorder and remain relatively small. By contrast, the abrupt increase in σ2 observed in the 1st SiC bilayer indicates the presence of additional disorder contributions, possibly arising from variations in the atomic distance and bond stiffness associated with interfacial Si-C bonding relative to the bulk.

To estimate the maximum possible elongation of interfacial Si-C bonds relative to those in the bulk, we conservatively attribute the entire increase in σ2 to the static component. In this framework, one of the four Si-C bonds corresponds to bonding between interfacial Si atoms and C atoms in the buffer layer, whose atomic distance is *DSi-buffer*. Under this assumption, the increase in the σ2 value for the 1st SiC bilayer can be expressed as follows:

where is the average atomic distance of the Si and C in the coordination shell. Therefore, the maximum elongation of the to the is estimated to be less than 0.02 nm.


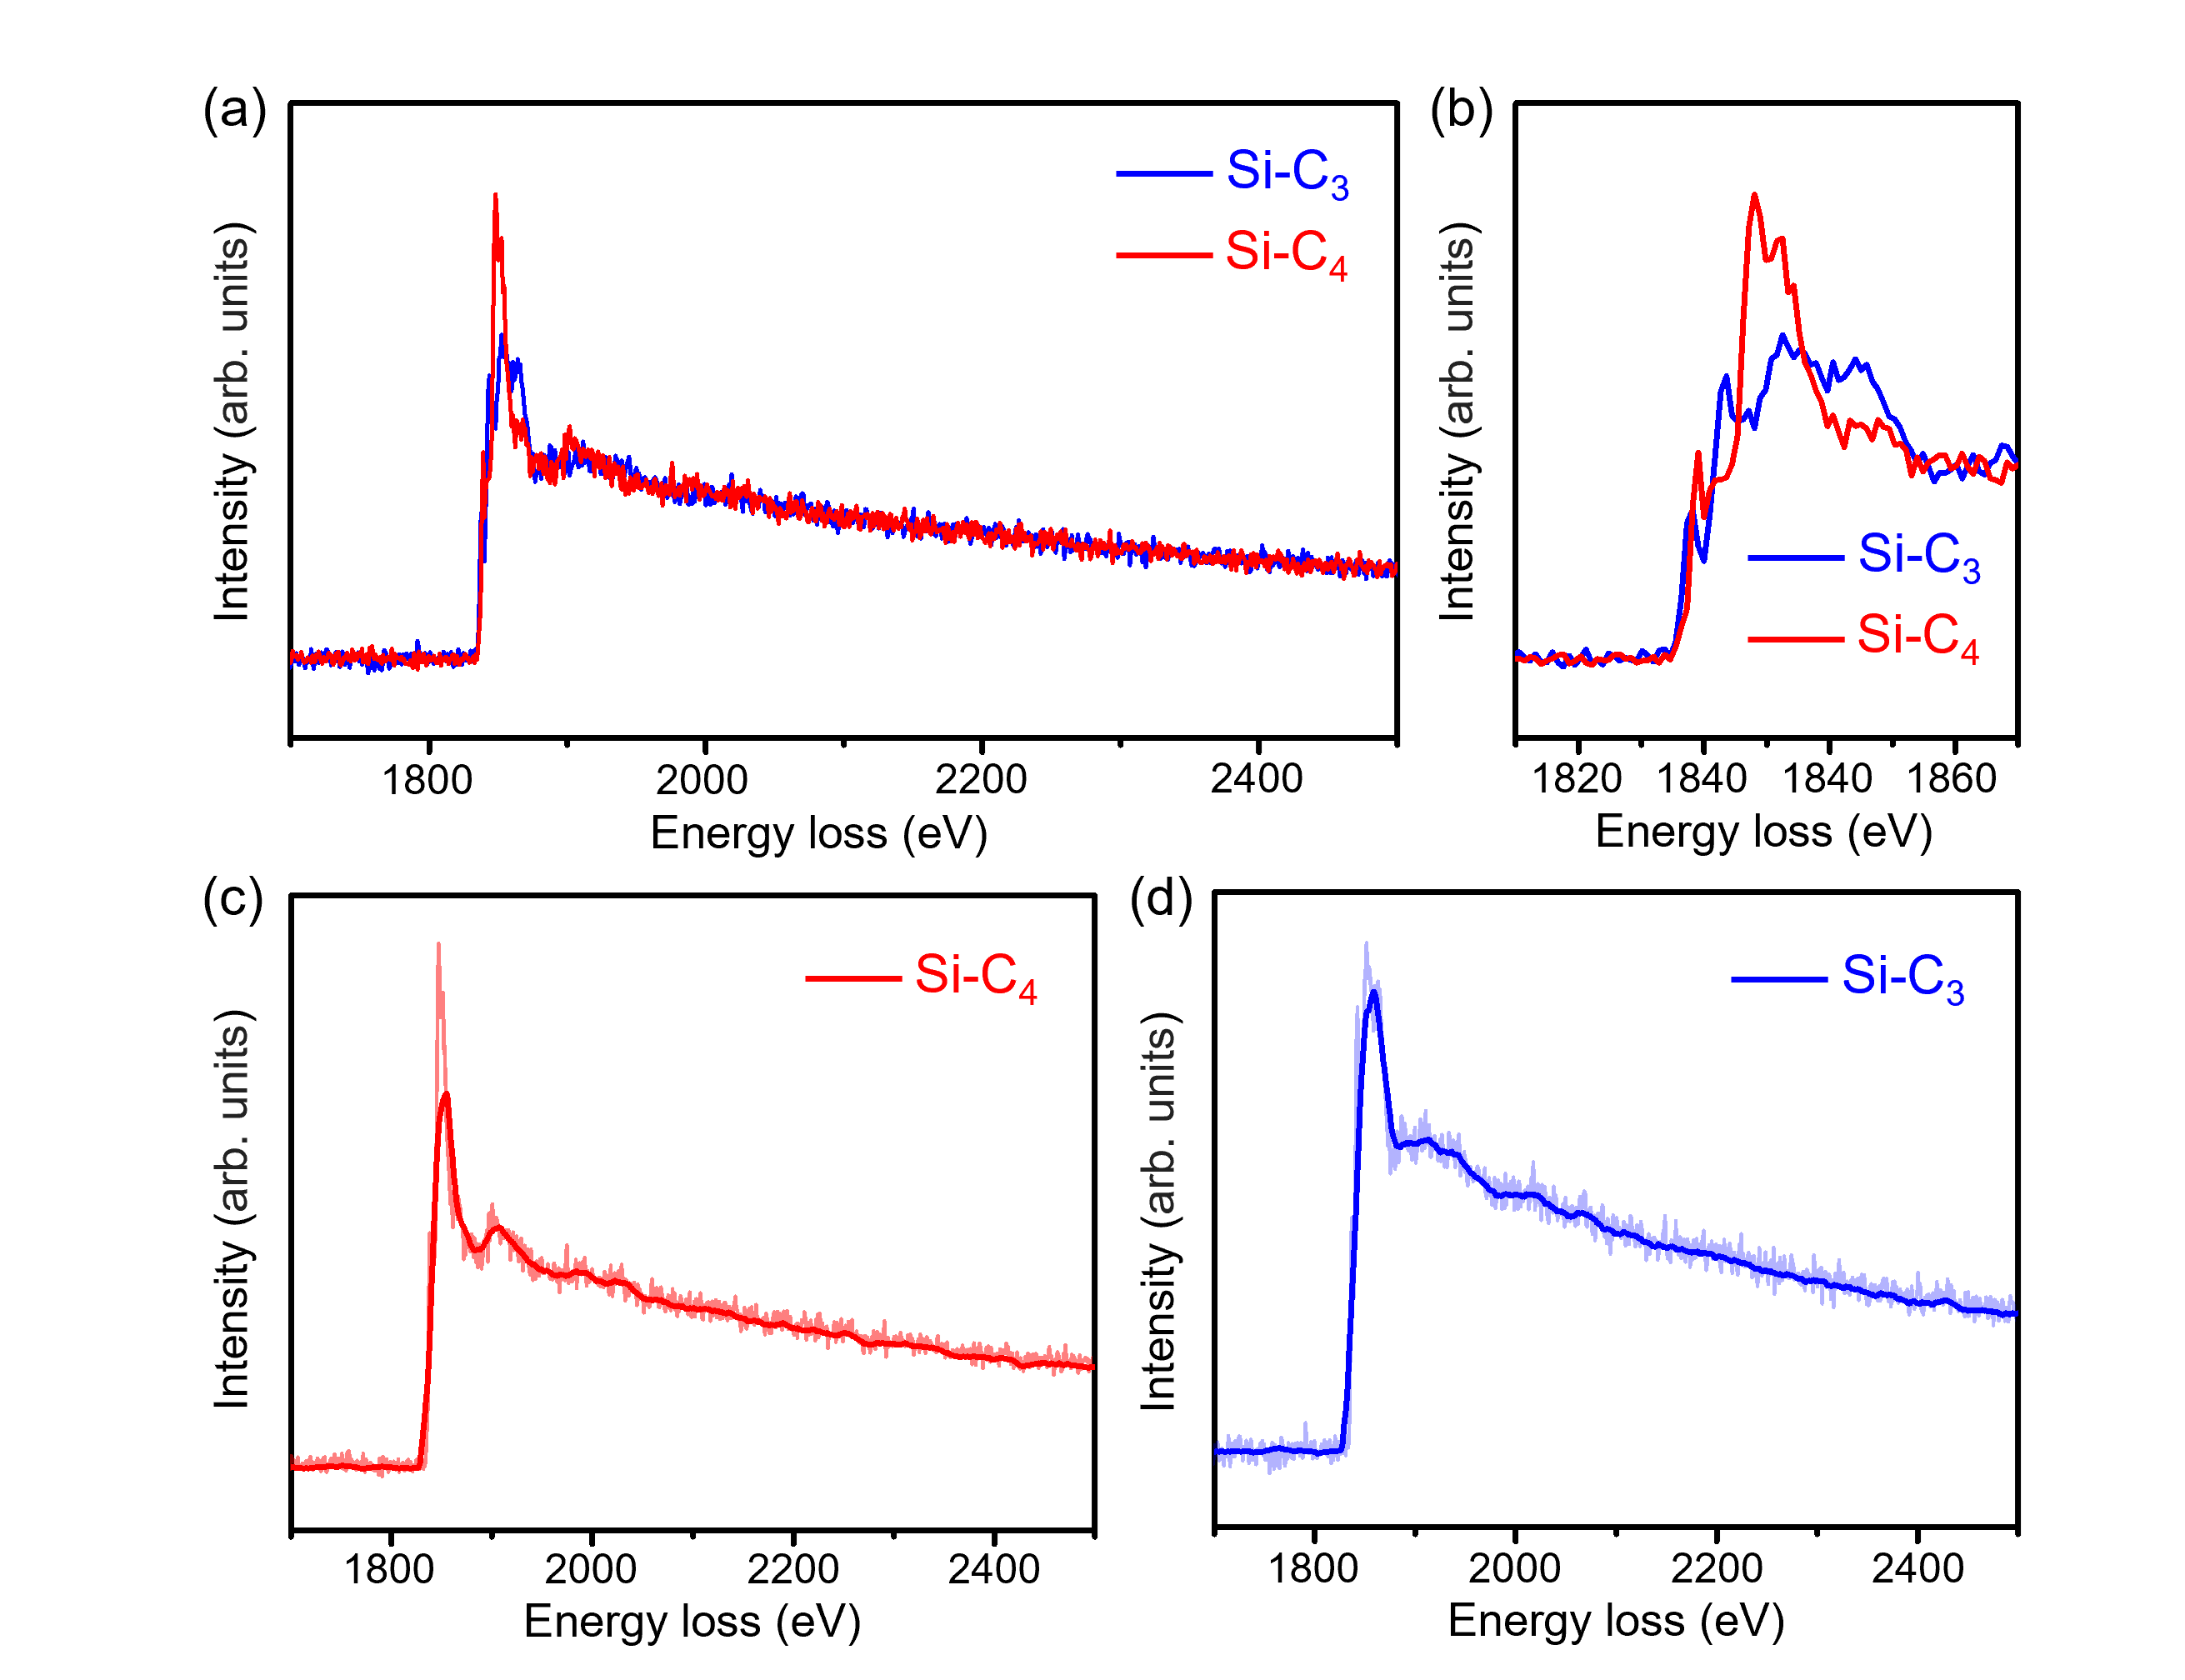


**Fig. S5. Si-*K* edge spectra of the Si point defects in graphene.** (a) The summed spectra of Si-C4 and Si-C3, respectively. (b) The ELNES region of (a). The comparison of the summed and denoised spectra of (c) Si-C3 and (b) Si-C4.

The ELNES features of the Si-*K* edges are different from that of the Si-*L* edge as reported in the previous studies 6. This is because the Si-*K* edges mainly reflect the excitation of inner shell electrons from the 1*s* states to the unoccupied 3*p* states, while the Si-*L* edges mainly reflect the excitation from the 2*p* states to the unoccupied 3*d* states.

Although the spectra acquired from the Si point defects are noised than the graphene/6H-SiC interface case, the coordination of these single Si atoms can still be determined using STEM-EXELFS. This is because their nearest-neighbor environments are mainly reflected in the low-frequency oscillations of the EXELFS, while high-frequency noise can be suppressed through Fourier transformation, as shown in Figs. 3c-d.

**Table S3. Curve-fit parameters*a* for Si-*K* edge of Si point defects in graphene.**

| sample | Path | R*b* (Å) | C.N.*c* | σ2 (Å2)*d* | ΔE0 (eV) | R-factor (*10-3) |
| --- | --- | --- | --- | --- | --- | --- |
| Si-C4  model 7 | Si-C | 1.90 | 4 |  |  |  |
| Si-C3  Model 7 | Si-C | 1.75 | 3 |  |  |  |
| Si-C4 | Si-C | 1.81±0.02 | 4.6±1.1 | 0.0005±0.004 | 7.8±2.5 | 6.4 |
| Si-C3 | Si-C | 1.68±0.05 | 3.4±2.1 | 0.0004±0.008 | 1.7±6.7 | 33.4 |

*a*: The selected *R* window and *k* window for the EXELFS fitting are 1.0-2.0 Å and 2.0-9.0 Å-1, respectively. The *S02* was set to be 7.7. *b*: The half path length. The paths for Si-C and Si-Si is from the DFT-relaxed models of Si-C4 and Si-C3 7. *c*: Coordination number. *d*: Debye-Waller factor.

**Reference:**

1 Spiegelberg, J. *et al.* Local low rank denoising for enhanced atomic resolution imaging. *Ultramicroscopy* **187**, 34-42 (2018).

2 Ravel, B. & Newville, M. ATHENA, ARTEMIS, HEPHAESTUS: Data analysis for X-ray absorption spectroscopy using IFEFFIT. *J. Synchrotron Radiat.* **12**, 537-541 (2005).

3 Egerton, R. F. *Electron Energy-loss Spectroscopy in the Electron Microscope*. (Springer, Boston, MA, 2011).

4 *Si Crystal Structure: Datasheet from "PAULING FILE Multinaries Edition – 2022" in SpringerMaterials (*[*https://materials.springer.com/isp/crystallographic/docs/sd_0304951*](https://materials.springer.com/isp/crystallographic/docs/sd_0304951)*)*. (Springer-Verlag Berlin Heidelberg & Material Phases Data System (MPDS), Switzerland & National Institute for Materials Science (NIMS), Japan).

5 *6H-SiC Crystal Structure: Datasheet from the Materials Project for SiC (mp-7631) from database version v2022.10.28. (*[*https://doi.org/10.17188/1293198*](https://doi.org/10.17188/1293198)*)*.

6 Zhou, W. *et al.* Direct determination of the chemical bonding of individual impurities in graphene. *Phys. Rev. Lett.* **109**, 206803 (2012).

7 Xu, M. *et al.* Single-atom vibrational spectroscopy with chemical-bonding sensitivity. *Nat. Mater.* **22**, 612-618 (2023).
